# Supplementary material
Source: PubMed Central journal article supplement (PMC4078814)
Supplement: 1405590111_pnas.201405590SI.pdf [file 1405590111_pnas.201405590SI.pdf]

# Supporting Information

Stavnezer et al. 10.1073/pnas.1405590111

**Table S1. Analysis of SHM in individual APE- and UNG-deficient mice**

| Genotype                                      | No. of mice | Total mutations | Total nt present in mutated sequences | Mutation frequency ( $\times 10^{-3}$ ) | % of mutations at C:G bp corrected <sup>*,†</sup> | % of C:G mutations that are transitions A:T bp corrected <sup>*,†</sup> | % of mutations at A:T bp corrected <sup>*,†</sup> | Ratio of A:T mutations to mutations corrected <sup>*,†</sup> | % of mutations at WRC/GYW hotspots <sup>‡</sup> | Indels <sup>§</sup> | Frequency of indels ( $\times 10^{-4}$ ) <sup>§</sup> |
|-----------------------------------------------|-------------|-----------------|---------------------------------------|-----------------------------------------|---------------------------------------------------|-------------------------------------------------------------------------|---------------------------------------------------|--------------------------------------------------------------|-------------------------------------------------|---------------------|-------------------------------------------------------|
| <i>Wildtype</i>                               | 1           | 258             | 13,804                                | 18.7                                    | 45.5                                              | 54.5                                                                    | 54.5                                              | 2.5                                                          | 19.6                                            | 3                   | 2.173                                                 |
|                                               | 2           | 191             | 13,305                                | 14.4                                    | 44.9                                              | 58.6                                                                    | 55.1                                              | 1.6                                                          | 18.4                                            | 3                   | 2.255                                                 |
|                                               | 3           | 1,510           | 36,482                                | 41.4                                    | 39.8                                              | 68.8                                                                    | 60.2                                              | 2.5                                                          | 18.1                                            | 3                   | 0.822                                                 |
|                                               | 4           | 176             | 9,367                                 | 18.8                                    | 35.5                                              | 69.0                                                                    | 64.5                                              | 2.3                                                          | 14.0                                            | 2                   | 2.135                                                 |
|                                               | 5           | 1,110           | 39,922                                | 27.8                                    | 39.1                                              | 57.0                                                                    | 60.9                                              | 1.7                                                          | 17.2                                            | 5                   | 1.252                                                 |
|                                               | 6           | 732             | 39,350                                | 18.6                                    | 41.2                                              | 51.1                                                                    | 58.8                                              | 1.6                                                          | 17.2                                            | 10                  | 2.541                                                 |
|                                               | 7           | 662             | 39,440                                | 16.8                                    | 41.4                                              | 50.7                                                                    | 58.6                                              | 1.7                                                          | 19.1                                            | 6                   | 1.521                                                 |
| Total/AVG                                     | 4,639       | 191,670         | 22.4                                  | 41.1                                    | 58.5                                              | 58.9                                                                    | 58.9                                              | 2.0                                                          | 17.7                                            | 32                  | 1.814                                                 |
| <i>apex1<sup>+/-</sup></i>                    | 1           | 178             | 11,314                                | 15.7                                    | 43.3                                              | 59.6                                                                    | 56.7                                              | 1.8                                                          | 26.3                                            | 2                   | 1.768                                                 |
|                                               | 2           | 216             | 9,663                                 | 22.4                                    | 37.1                                              | 66.7                                                                    | 62.9                                              | 1.1                                                          | 17.5                                            | 6                   | 6.209                                                 |
|                                               | 3           | 556             | 37,468                                | 14.8                                    | 48.1                                              | 55.6                                                                    | 51.9                                              | 1.6                                                          | 15.5                                            | 5                   | 1.334                                                 |
|                                               | 4           | 299             | 19,720                                | 15.2                                    | 51.0                                              | 60.5                                                                    | 49.0                                              | 1.1                                                          | 20.6                                            | 1                   | 0.507                                                 |
|                                               | 5           | 1,091           | 39,389                                | 27.7                                    | 45.0                                              | 58.7                                                                    | 55.0                                              | 1.6                                                          | 21.6                                            | 5                   | 1.269                                                 |
| Total/AVG                                     | 2,340       | 117,554         | 19.2                                  | 44.9                                    | 60.2                                              | 55.1                                                                    | 55.1                                              | 1.4                                                          | 20.3                                            | 19                  | 2.218                                                 |
| <i>P =</i>                                    |             |                 |                                       | 0.5157                                  | 0.1540                                            | 0.6749                                                                  | 0.1540                                            | 0.0402                                                       | 0.1614                                          | —                   | 0.6600                                                |
| <i>apex2<sup>Y/-</sup></i>                    | 1           | 206             | 24,618                                | 8.4                                     | 52.7                                              | 67.2                                                                    | 47.3                                              | 1.1                                                          | 23.0                                            | 3                   | 1.219                                                 |
|                                               | 2           | 324             | 31,059                                | 10.4                                    | 57.2                                              | 67.9                                                                    | 42.8                                              | 2.6                                                          | 25.1                                            | 0                   | 0.000                                                 |
|                                               | 3           | 418             | 20,143                                | 20.8                                    | 49.1                                              | 67.2                                                                    | 50.9                                              | 2.5                                                          | 20.3                                            | 4                   | 1.986                                                 |
|                                               | 4           | 203             | 27,115                                | 7.5                                     | 53.2                                              | 59.7                                                                    | 46.8                                              | 2.3                                                          | 24.3                                            | 0                   | 0.000                                                 |
|                                               | 5           | 262             | 32,045                                | 8.1                                     | 46.4                                              | 54.7                                                                    | 53.6                                              | 1.3                                                          | 26.5                                            | 2                   | 0.624                                                 |
| Total/AVG                                     | 1,413       | 134,980         | 11.1                                  | 51.7                                    | 63.3                                              | 63.3                                                                    | 48.3                                              | 2.0                                                          | 23.8                                            | 9                   | 0.077                                                 |
| <i>P =</i>                                    |             |                 |                                       | 0.0373                                  | 0.0006                                            | 0.2670                                                                  | 0.0006                                            | 0.9920                                                       | 0.0004                                          | —                   | 0.0327                                                |
| <i>apex1<sup>+/-</sup>apex2<sup>Y/-</sup></i> | 1           | 93              | 9,860                                 | 9.4                                     | 67.2                                              | 81.3                                                                    | 32.8                                              | 1.6                                                          | 23.0                                            | 2                   | 2.028                                                 |
|                                               | 2           | 266             | 18,734                                | 14.2                                    | 56.8                                              | 68.6                                                                    | 43.2                                              | 2.2                                                          | 21.6                                            | 0                   | 0.000                                                 |
|                                               | 3           | 472             | 44,863                                | 10.5                                    | 51.6                                              | 61.1                                                                    | 48.4                                              | 2.0                                                          | 21.2                                            | 3                   | 0.669                                                 |
|                                               | 4           | 363             | 38,947                                | 9.3                                     | 47.9                                              | 65.4                                                                    | 52.1                                              | 2.0                                                          | 22.6                                            | 6                   | 1.541                                                 |
|                                               | 5           | 585             | 41,903                                | 14.0                                    | 45.4                                              | 56.3                                                                    | 54.6                                              | 1.2                                                          | 22.5                                            | 3                   | 0.716                                                 |
| Total/AVG                                     | 1,779       | 154,307         | 11.5                                  | 53.8                                    | 66.5                                              | 66.5                                                                    | 46.2                                              | 1.8                                                          | 22.2                                            | 14                  | 0.991                                                 |
| <i>P =</i>                                    |             |                 |                                       | 0.0312                                  | 0.0051                                            | 0.1351                                                                  | 0.0051                                            | 0.5135                                                       | 0.0004                                          | —                   | 0.0717                                                |
| <i>ung<sup>-/-</sup></i>                      | 1           | 751             | 40,631                                | 18.5                                    | 52.1                                              | 90.5                                                                    | 47.9                                              | 2.3                                                          | 29.7                                            | 4                   | 0.984                                                 |
|                                               | 2           | 1,043           | 43,877                                | 23.8                                    | 54.2                                              | 88.3                                                                    | 45.8                                              | 1.4                                                          | 26.4                                            | 1                   | 0.228                                                 |
|                                               | 3           | 400             | 22,185                                | 17.8                                    | 56.9                                              | 93.3                                                                    | 43.1                                              | 1.4                                                          | 30.3                                            | 2                   | 0.902                                                 |
| Total/AVG                                     | 2,194       | 106,693         | 20.0                                  | 54.4                                    | 90.7                                              | 90.7                                                                    | 45.6                                              | 1.7                                                          | 28.8                                            | 7                   | 0.705                                                 |
| <i>P =</i>                                    |             |                 |                                       | 0.6948                                  | 0.0003                                            | 0.0008                                                                  | 0.0003                                            | 0.4490                                                       | <0.0001                                         | —                   | 0.0241                                                |
| <i>ung<sup>-/-</sup>apex1<sup>+/-</sup></i>   | 1           | 543             | 28,101                                | 19.3                                    | 62.2                                              | 94.8                                                                    | 37.8                                              | 1.4                                                          | 31.5                                            | 1                   | 0.356                                                 |
|                                               | 2           | 740             | 43,877                                | 16.9                                    | 50.5                                              | 92.3                                                                    | 49.5                                              | 1.8                                                          | 24.5                                            | 5                   | 1.140                                                 |
|                                               | 3           | 404             | 38,947                                | 10.4                                    | 62.8                                              | 90.6                                                                    | 37.2                                              | 1.4                                                          | 32.0                                            | 3                   | 0.770                                                 |
| Total/AVG                                     | 1,687       | 110,925         | 15.5                                  | 58.5                                    | 92.6                                              | 92.6                                                                    | 41.5                                              | 1.6                                                          | 29.3                                            | 9                   | 0.755                                                 |
| <i>P vs. WT</i>                               |             |                 |                                       | 0.2747                                  | 0.0005                                            | 0.0001                                                                  | 0.0005                                            | 0.1762                                                       | 0.0002                                          | —                   | 0.0284                                                |
| <i>P vs. UNG</i>                              |             |                 |                                       | 0.2401                                  | 0.3870                                            | 0.5213                                                                  | 0.3870                                            | 0.6272                                                       | 0.8534                                          | —                   | 0.8854                                                |
